# Supplementary material
Source: Springer Nature journal article supplement (https://www.springermedizin.de/resource/supplementary/12913_2011_1960_MOESM1_ESM.pdf/9530582)
Supplement: MOESM1 [file 9530582]

- Clinical service plans
- Co-ordinated services
- Streamlined pathways for referral, networking, communication
- Case managers appointed
- Clinical groups to monitor safety and quality

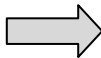

- Equity of access to new interventions and services across all regions
- Reduced length of stay
- Reduced time on trolley

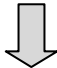

Cost reductions
